# Supplementary material for: Lithium and Copper Induce the Osteogenesis-Angiogenesis Coupling of Bone Marrow Mesenchymal Stem Cells via Crosstalk between Canonical Wnt and HIF-1α Signaling Pathways
Source: Hindawi journal article supplement (doi:10.1155/2021/6662164), 2021-03-06
Supplement: f1 [file 6662164.f1.pdf]

## Supplement Table 1. Primers for RT-qPCR and ChIP

### Primers for RT-qPCR and ChIP

| Gene             | Forward Primer          | Reverse Primer          |
|------------------|-------------------------|-------------------------|
| $\beta$ -catenin | TGACACCTCCCAAGTCCTTT    | TTGCATACTGCCCCGTCAAT    |
| GSK3 $\beta$     | CTTTGGAAGTGCAAAGCAG     | CCAACCTGATCCACACCAC     |
| Osterix          | AGCGACCACTTGAACAAACAT   | GCGGCTGATTGGCTTCTTCT    |
| HIF-1 $\alpha$   | TCATCAGTTGCCACTTCCCCAC  | CCGTCATCTGTTAGCACCATCAC |
| VEGF             | ACTTGTGTTGGGAGGAGGATGTC | AATGGGTTTGTTCGTGTTTCTGG |
| ALP              | ATCTTTGGTCTGGCTCCCATG   | TTTCCCGTTCACCGTCCAC     |
| Osterix-ChIP     | CTCATTGGATCCGGAGTCTTCT  | TGTCTGTAGGGATCCACCCTCTA |
| VEGF-ChIP        | AGAGAGATCAGGAGGAACAA    | TGCACTGTGTAGTCTGGCAGAGC |
| GAPDH            | GAACGGATTTGGCCGTATTG    | TTTGGCTCCACCCTTCAAG     |
