# Supplementary material for: Lithium and Copper Induce the Osteogenesis-Angiogenesis Coupling of Bone Marrow Mesenchymal Stem Cells via Crosstalk between Canonical Wnt and HIF-1α Signaling Pathways
Source: Hindawi journal article supplement (doi:10.1155/2021/6662164), 2021-03-06
Supplement: f2 [file 6662164.f2.pdf]

Supplementary Table 2. Western blot, Flow cytometry, Immunofluorescence and ChIP antibodies used in this study.

| Application        | Primary antibody | Dilution | Reference | Provider       | Secondary antibody                                   |
|--------------------|------------------|----------|-----------|----------------|------------------------------------------------------|
| Western blot       | $\beta$ -catenin | 1:1000   | ab32572   | Abcam          | Anti-Rabbit HRP                                      |
| Western blot       | p-GSK3 $\beta$   | 1:1000   | ab75814   | Abcam          | Anti-Rabbit HRP                                      |
| Western blot       | Osterix          | 1:1000   | ab22552   | Abcam          | Anti-Rabbit HRP                                      |
| Western blot       | HIF-1 $\alpha$   | 1:1000   | ab82832   | Abcam          | Anti-Rabbit HRP                                      |
| Western blot       | VEGF             | 1:1000   | sc-7269   | Santa cruze    | Anti-Mouse HRP                                       |
| Western blot       | ALP              | 1:1000   | ab65834   | Abcam          | Anti-Rabbit HRP                                      |
| Western blot       | GAPDH            | 1:1000   | ab181602  | Abcam          | Anti-Rabbit HRP                                      |
| Flow cytometry     | CD29             | 1:50     | 102207    | Biologend      | -                                                    |
| Flow cytometry     | CD44             | 1:50     | 103012    | Biologend      | -                                                    |
| Flow cytometry     | CD90             | 1:50     | 202526    | Biologend      | -                                                    |
| Flow cytometry     | CD34             | 1:50     | 119307    | Biologend      | -                                                    |
| Flow cytometry     | CD11b            | 1:50     | 101212    | Biologend      | -                                                    |
| Flow cytometry     | CD45             | 1:50     | 103106    | Biologend      | -                                                    |
| Immunofluorescence | $\beta$ -catenin | 1:100    | ab32572   | Abcam          | Goat Anti-Rabbit IgG (Alexa Fluor <sup>®</sup> 488)  |
| Immunofluorescence | VEGF             | 1:100    | sc-7269   | Santa cruze    | Rabbit Anti-Mouse IgG (Alexa Fluor <sup>®</sup> 594) |
| ChIP               | $\beta$ -catenin | 1:50     | ab32572   | Abcam          |                                                      |
| ChIP               | HIF-1 $\alpha$   | 1:50     | 36169S    | Cell Signaling |                                                      |
